# Supplementary material for: Fas mutation reduces obesity by increasing IL-4 and IL-10 expression and promoting white adipose tissue browning
Source: PubMed Central journal article supplement (PMC7371740; doi:10.1038/s41598-020-68971-7), 2020-07-20
Supplement: 41598_2020_68971_MOESM1_ESM.pdf [file 41598_2020_68971_MOESM1_ESM.pdf]

## **Supplementary information**

### **Title:**

***Fas* mutation reduces obesity by increasing IL-4 and IL-10 expression and promoting white adipose tissue browning**

### **Authors:**

Eun Wha Choi<sup>1,2, \*</sup>, Minjae Lee<sup>2</sup>, Ji Woo Song<sup>2</sup>, Kyeongdae Kim<sup>3</sup>, Jungmin Lee<sup>2,4</sup>, Jehoon Yang<sup>2</sup>, Seo Hyun Lee<sup>4</sup>, Il Yong Kim<sup>4</sup>, Jae-Hoon Choi<sup>3</sup>, Je Kyung Seong<sup>4,5,\*</sup>

<sup>1</sup>Department of Veterinary Clinical Pathology, College of Veterinary Medicine & Institute of Veterinary Science, Kangwon National University, 1 Kangwondaehak-gil, Chuncheon, Gangwon-do, 24341, Republic of Korea

<sup>2</sup>Laboratory Animal Research Center, Samsung Biomedical Research Institute, Samsung Medical Center, 81 Irwon-ro, Gangnam-gu, Seoul, 06351, Republic of Korea

<sup>3</sup>Department of Life Science, College of Natural Sciences, Hanyang University, 222 Wangsimni-ro, Seongdong-gu, Seoul, 04763, Republic of Korea

<sup>4</sup>Laboratory of Developmental Biology and Genomics, BK21 Plus Program for Advanced Veterinary Science, Research Institute for Veterinary Science, College of Veterinary Medicine, and Korea Mouse Phenotyping Center, Seoul National University, 1 Gwanak-ro, Gwanak-gu, Seoul, 08826, Republic of Korea

<sup>5</sup>Interdisciplinary Program for Bioinformatics, Seoul National University, 1 Gwanak-ro, Gwanak-gu, Seoul, 08826, Republic of Korea

\*Corresponding author: Eun Wha Choi, DVM, PhD, Assistant Professor

Address: Department of Veterinary Clinical Pathology, College of Veterinary Medicine & Institute of Veterinary Science, Kangwon National University, 1 Kangwondaehak-gil, Chuncheon-si, Gangwon-do 24341, Republic of Korea

Telephone: 82-33-250-8794

Fax: 82-33-259-5625

E-mail: ewchoi@kangwon.ac.kr

\*Corresponding author: Je Kyung Seong, DVM, PhD, Professor

Laboratory of Developmental Biology and Genomics, BK21 Program for Veterinary Science, Institute for Veterinary Science, College of Veterinary Medicine, Seoul National University, 599 Gwanak-ro, Gwanak-gu, Seoul, 08826, Republic of Korea

Korea Mouse Phenotyping Center (KMPC), Seoul National University, 1 Gwanak-ro, Gwanak-gu, Seoul, 08826, Republic of Korea.

Telephone: 82-2-880-1259

Fax: 82-2-875-8395

E-mail: snumouse@snu.ac.kr

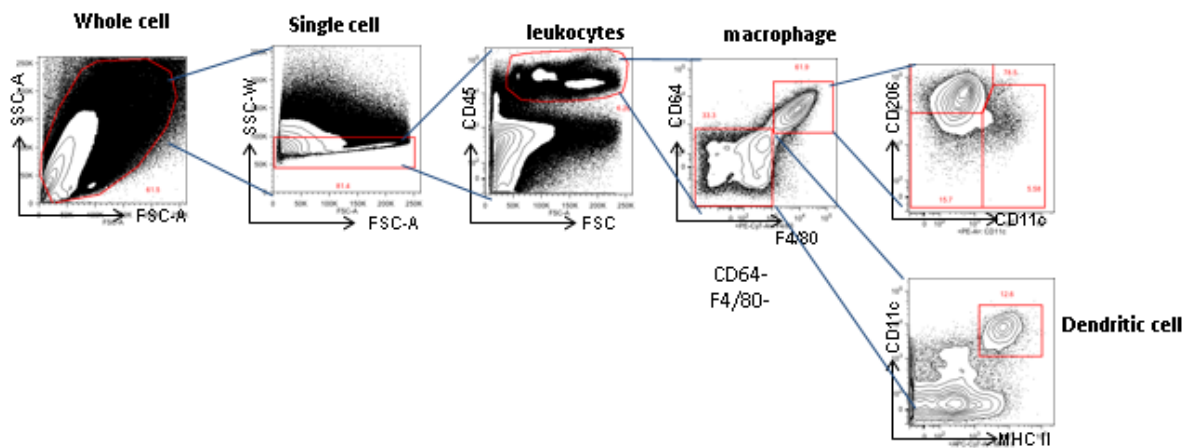

**Supplementary Figure 1. A representative gating scheme of dendritic cell and macrophage populations in the epididymal white adipose tissues.** For analysis of dendritic cell and macrophage populations, stromal vascular cells obtained from epididymal white adipose tissues were stained with FITC-conjugated anti-CD206, PE-conjugated anti-CD11c, PerCP-conjugated anti-CD45, PE-Cy7-conjugated anti-F4/80, APC-conjugated anti-CD64 and APC-Cy7-conjugated anti-MHC class II antibodies.

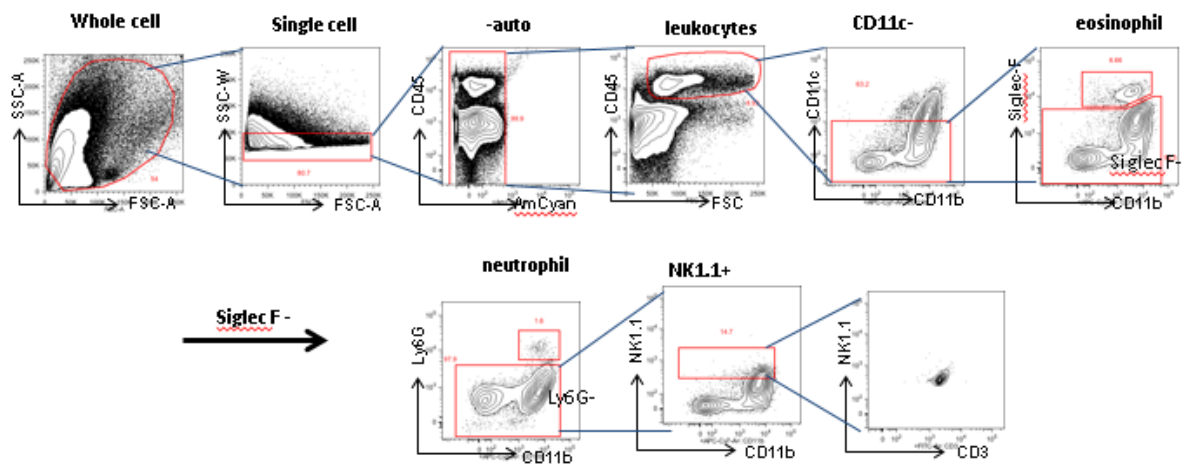

**Supplementary Figure 2. A representative gating scheme of eosinophil, neutrophil, NK cell and NKT cell populations in the epididymal white adipose tissues.** For analysis of eosinophil, neutrophil, NK cell and NKT cell populations, stromal vascular cells obtained from epididymal white adipose tissues were stained with FITC-conjugated anti-CD3, PE-conjugated anti-NK1.1, PerCP-conjugated anti-CD45, PE-Cy7-conjugated anti-CD11c, APC-conjugated anti-Ly6G and APC-Cy7-conjugated anti-CD11b and BV421-conjugated anti-Siglec-F antibodies.

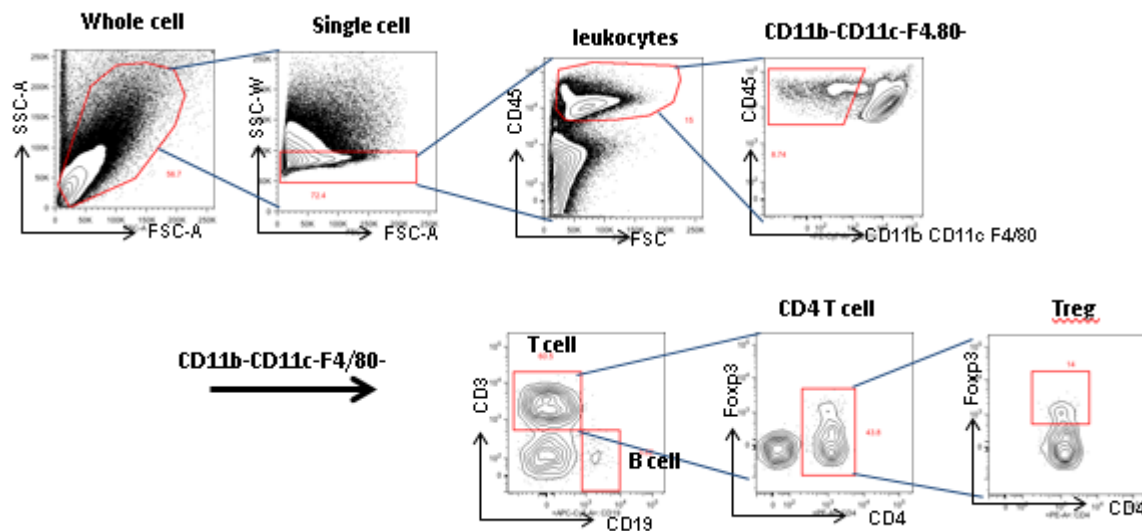

**Supplementary Figure 3. A representative gating scheme of T cell, B cell, Treg cell populations in the epididymal white adipose tissues.** For analysis of T cell, B cell, Treg cell populations, stromal vascular cells obtained from epididymal white adipose tissues were stained with FITC-conjugated anti-CD3, PE-conjugated anti-CD4, PerCP-conjugated anti-CD45, PE-Cy7-conjugated anti-CD11b, CD11c, F4/80, APC-conjugated anti-Foxp3 and APC-Cy7-conjugated anti-CD19 antibodies.

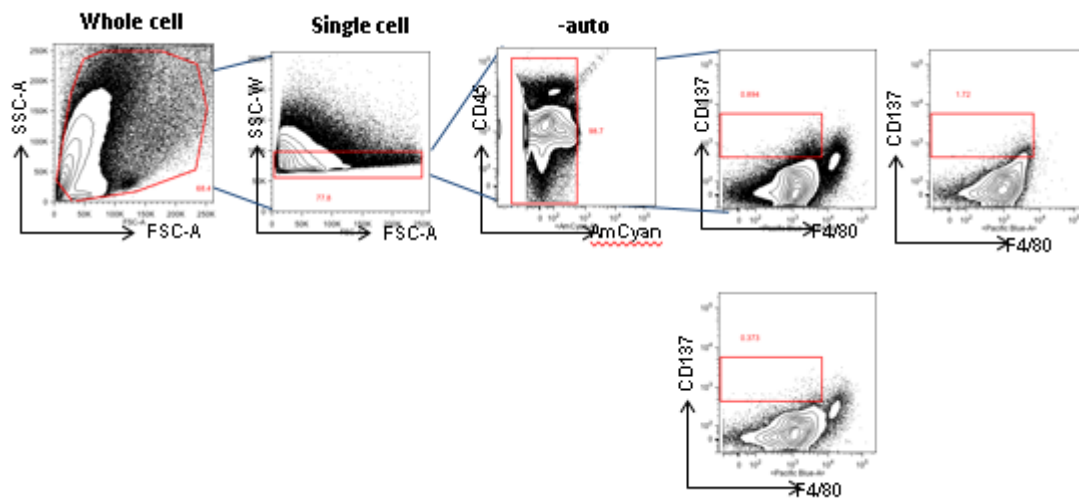

**Supplementary Figure 4. A representative gating scheme of F4/80- CD137+ cell populations in the epididymal white adipose tissues.** For analysis of F4/80- CD137+ cell populations, stromal vascular cells obtained from epididymal white adipose tissues were stained with APC-conjugated anti-CD137 and Pacific blue-conjugated anti-F4/80 antibodies.
